# Supplementary material for: Heritability of Cardiovascular and Personality Traits in 6,148 Sardinians
Source: PubMed Central journal article supplement (PMC1557782; doi:10.1371/journal.pgen.0020132), 2006-08-25
Supplement: pgen.0020132.st001.pdf [file pgen.0020132.st001.pdf]

Supplementary Table 1: Summary Statistics for 98 quantitative traits

| Age Band<br># individual¶  | Overall             |              | Males              |                      |                      |                     | Females            |                       |                      |                     | Significant Variation |      |
|----------------------------|---------------------|--------------|--------------------|----------------------|----------------------|---------------------|--------------------|-----------------------|----------------------|---------------------|-----------------------|------|
|                            | 6111                | (43.6)       | 14-29 yrs<br>688.3 | 30 - 44 yrs<br>743.0 | 45 - 59 yrs<br>611.7 | 60-102 yrs<br>564.2 | 14-29 yrs<br>904.8 | 30 - 44 yrs<br>1049.6 | 45 - 59 yrs<br>851.3 | 60-102 yrs<br>698.2 | Age                   | Sex  |
| <b>Blood Test Analyses</b> | <b>Units</b>        |              |                    |                      |                      |                     |                    |                       |                      |                     |                       |      |
| RBC                        | 10 <sup>6</sup> /uL | 4.8 (0.6)    | 5.3                | 5.2                  | 5.1                  | 4.9                 | 4.6                | 4.6                   | 4.7                  | 4.7                 | ****                  | **** |
| Hb                         | g/dL                | 13.8 (1.5)   | 14.9               | 14.9                 | 14.9                 | 14.7                | 13.0               | 12.8                  | 13.1                 | 13.4                | ****                  | **** |
| MCV (mean RBC vol)         | fL                  | 86.5 (9.3)   | 85.0               | 86.5                 | 88.0                 | 90.2                | 85.0               | 85.4                  | 86.0                 | 87.6                | ****                  | **** |
| MCH (mean RBC Hb)          | pg                  | 28.8 (3.6)   | 28.6               | 29.1                 | 29.4                 | 30.1                | 28.3               | 28.4                  | 28.5                 | 29.0                | ****                  | **** |
| WBC                        | 10 <sup>3</sup> /uL | 6.7 (1.7)    | 7.1                | 7.0                  | 7.1                  | 6.9                 | 6.7                | 6.5                   | 6.2                  | 6.2                 | ****                  | **** |
| NE (neutrophils)           | %                   | 56.6 (8.7)   | 54.6               | 56.6                 | 56.1                 | 57.5                | 55.1               | 58.3                  | 57.2                 | 57.0                | ****                  | **** |
| LY (lymphocytes)           | %                   | 34.5 (7.9)   | 35.8               | 34.3                 | 34.3                 | 32.4                | 36.7               | 33.7                  | 34.2                 | 34.2                | ****                  | **** |
| MO (monocytes)             | %                   | 5.9 (2.3)    | 6.6                | 6.0                  | 6.3                  | 6.7                 | 5.6                | 5.3                   | 5.6                  | 5.8                 | ****                  | **** |
| EO (eosinophils)           | %                   | 2.6 (1.8)    | 2.7                | 2.7                  | 2.9                  | 3.0                 | 2.3                | 2.3                   | 2.6                  | 2.6                 | ****                  | **** |
| BA (basophils)             | %                   | 0.4 (0.3)    | 0.4                | 0.3                  | 0.3                  | 0.3                 | 0.4                | 0.4                   | 0.4                  | 0.4                 | ****                  | **   |
| PLT (platelets)            | 10 <sup>3</sup> /uL | 243.0 (60.0) | 234.0              | 231.0                | 227.0                | 220.0               | 263.0              | 258.0                 | 256.0                | 237.0               | ****                  | **** |
| HbF                        | %                   | 0.4 (0.7)    | 0.4                | 0.3                  | 0.3                  | 0.3                 | 0.5                | 0.5                   | 0.4                  | 0.4                 | ****                  | **** |
| HbA2                       | %                   | 3.1 (1.0)    | 3.1                | 3.1                  | 3.1                  | 3.0                 | 3.1                | 3.1                   | 3.0                  | 2.9                 | **                    | **** |
| HbA1C                      | %                   | 5.4 (0.8)    | 5.2                | 5.3                  | 5.8                  | 5.9                 | 5.1                | 5.2                   | 5.5                  | 5.9                 | ****                  | **** |
| G6PD                       | U/dL                | 1.2 (0.4)    | 1.3                | 1.3                  | 1.2                  | 1.2                 | 1.3                | 1.2                   | 1.2                  | 1.2                 | ****                  | **** |
| SERUM GLUCOSE              | mg/dL               | 90.1 (23.7)  | 84.7               | 89.8                 | 100.0                | 104.0               | 79.0               | 82.9                  | 90.4                 | 100.0               | ****                  | **** |
| SERUM INSULIN              | micro/U/mL          | 8.5 (8.1)    | 7.4                | 8.1                  | 9.8                  | 9.0                 | 8.3                | 7.6                   | 8.8                  | 9.8                 | ****                  | **** |
| BUN                        | mg/dL               | 35.0 (10.4)  | 34.8               | 37.6                 | 37.5                 | 40.9                | 28.4               | 31.5                  | 34.8                 | 39.9                | ****                  | **** |
| SERUM CREATININE           | mg/dL               | 0.8 (0.2)    | 0.9                | 0.9                  | 0.9                  | 1.0                 | 0.7                | 0.7                   | 0.7                  | 0.8                 | ****                  | **** |
| ALT, ala aminotransferase  | U/L                 | 25.0 (23.1)  | 26.6               | 37.2                 | 34.1                 | 28.6                | 16.0               | 17.9                  | 22.5                 | 24.8                | ****                  | **** |
| AST, asp aminotransferase  | U/L                 | 21.6 (14.6)  | 22.2               | 24.4                 | 25.5                 | 25.8                | 17.2               | 17.4                  | 20.7                 | 24.2                | ****                  | **** |
| Gammagt, γ-glu-transferase | U/L                 | 27.9 (39.9)  | 22.0               | 41.1                 | 51.2                 | 46.7                | 13.8               | 15.8                  | 21.9                 | 27.7                | ****                  | **** |
| FIBRINOGEN                 | mg/dL               | 330.0 (67.4) | 289.0              | 300.0                | 316.0                | 347.0               | 326.0              | 332.0                 | 348.0                | 375.0               | ****                  | **** |
| CHOLESTEROL                | mg/dL               | 208.0 (42.2) | 175.0              | 213.0                | 226.0                | 220.0               | 185.0              | 204.0                 | 226.0                | 228.0               | ****                  | **** |
| HDL                        | mg/dL               | 64.1 (14.9)  | 55.6               | 57.1                 | 59.7                 | 62.6                | 66.3               | 68.3                  | 69.7                 | 69.0                | ****                  | **** |
| LDL                        | mg/dL               | 127.0 (35.4) | 105.0              | 134.0                | 141.0                | 136.0               | 106.0              | 121.0                 | 139.0                | 140.0               | ****                  | **   |
| TRIGLYCERIDES              | mg/dL               | 88.1 (68.3)  | 72.5               | 111.0                | 127.0                | 106.0               | 61.8               | 69.9                  | 84.8                 | 95.4                | ****                  | **** |
| IRON                       | microg/dL           | 87.7 (34.8)  | 94.1               | 98.3                 | 96.4                 | 95.2                | 80.2               | 80.1                  | 81.1                 | 85.7                | *                     | **** |
| TRANSFERRIN                | mg/dL               | 307.0 (62.9) | 301.0              | 293.0                | 297.0                | 292.0               | 326.0              | 325.0                 | 308.0                | 297.0               | ****                  | **** |
| BILIRUBIN, fractionated    | mg/dL               | 0.1 (0.1)    | 0.1                | 0.1                  | 0.1                  | 0.2                 | 0.1                | 0.1                   | 0.1                  | 0.1                 | ****                  | **** |
| BILIRUBIN, total           | mg/dL               | 0.7 (0.4)    | 0.8                | 0.8                  | 0.7                  | 0.8                 | 0.6                | 0.6                   | 0.6                  | 0.7                 | ****                  | **** |
| URIC ACID                  | mg/dL               | 4.3 (1.5)    | 4.8                | 5.1                  | 5.4                  | 5.7                 | 3.2                | 3.3                   | 3.8                  | 4.4                 | ****                  | **** |
| SODIUM                     | mEq/L               | 143.0 (3.6)  | 142.0              | 143.0                | 143.0                | 143.0               | 142.0              | 142.0                 | 143.0                | 143.0               | ****                  | **** |
| POTASSIUM                  | mEq/L               | 4.4 (0.4)    | 4.3                | 4.4                  | 4.5                  | 4.6                 | 4.3                | 4.4                   | 4.5                  | 4.5                 | ****                  | **** |
| ESR, erythrocyte sed. rate | mm/h                | 10.6 (8.2)   | 5.8                | 6.4                  | 7.1                  | 10.9                | 11.0               | 11.9                  | 13.4                 | 16.8                | ****                  | **** |
| CRP, C-reactive protein    | mg/dL               | 0.7 (1.1)    | 0.6                | 0.7                  | 0.7                  | 0.9                 | 0.7                | 0.7                   | 0.8                  | 0.9                 | ****                  | **** |
| TSH, thyroid stim. hormone | microU/L            | 1.9 (2.6)    | 4.2                | 2.5                  | 1.0                  | 2.0                 | 1.8                | 1.9                   | 1.9                  | 1.7                 | ****                  | **** |
| PSA                        |                     | 0.8 (1.1)    | 0.5                | 0.6                  | 0.7                  | 1.4                 |                    |                       |                      |                     | ****                  | **** |

| Age Band<br># individual¶             | Overall           |               | Males     |             |             |            | Females   |             |             |            | Significant Variation |      |
|---------------------------------------|-------------------|---------------|-----------|-------------|-------------|------------|-----------|-------------|-------------|------------|-----------------------|------|
|                                       |                   |               | 14-29 yrs | 30 - 44 yrs | 45 - 59 yrs | 60-102 yrs | 14-29 yrs | 30 - 44 yrs | 45 - 59 yrs | 60-102 yrs | Age                   | Sex  |
|                                       |                   | 6111 (43.6)   | 688.3     | 743.0       | 611.7       | 564.2      | 904.8     | 1049.6      | 851.3       | 698.2      |                       |      |
| <b><u>Anthropometric Measures</u></b> |                   |               |           |             |             |            |           |             |             |            |                       |      |
| HEIGHT                                | cm                | 160.0 (9.1)   | 169.0     | 169.0       | 165.0       | 161.0      | 158.0     | 157.0       | 153.0       | 150.0      | ****                  | **** |
| WEIGHT                                | kg                | 64.9 (13.3)   | 66.4      | 75.1        | 76.0        | 73.0       | 53.4      | 57.8        | 63.2        | 64.0       | ****                  | **** |
| WAIST                                 | cm                | 84.8 (13.1)   | 80.5      | 89.4        | 95.0        | 97.7       | 72.2      | 77.1        | 84.9        | 92.0       | ****                  | **** |
| HIP                                   | cm                | 97.6 (8.3)    | 93.8      | 98.0        | 98.9        | 99.0       | 93.3      | 96.3        | 101.0       | 102.0      | ****                  | *    |
| BMI, body mass index                  | kg/m <sup>2</sup> | 25.3 (4.7)    | 23.1      | 26.1        | 27.8        | 28.2       | 21.3      | 23.5        | 26.8        | 28.5       | ****                  | **** |
| <b><u>Cardiovascular Function</u></b> |                   |               |           |             |             |            |           |             |             |            |                       |      |
| systolic BP                           | mmHg              | 126.0 (18.5)  | 121.0     | 125.0       | 135.0       | 144.0      | 111.0     | 114.0       | 129.0       | 140.0      | ****                  | **** |
| diastolic BP                          | mmHg              | 77.0 (10.9)   | 71.0      | 79.2        | 84.9        | 83.9       | 68.4      | 72.8        | 80.0        | 81.7       | ****                  | **** |
| HR (heart rate)                       | beats/min         | 67.1 (11.2)   | 64.8      | 63.8        | 65.7        | 64.2       | 70.1      | 68.7        | 68.5        | 68.8       | *                     | **** |
| diam_S                                | mm                | 5.9 (0.7)     | 6.0       | 6.2         | 6.3         | 6.6        | 5.5       | 5.5         | 5.7         | 6.2        | ****                  | **** |
| diam_D                                | mm                | 5.4 (0.7)     | 5.3       | 5.6         | 5.8         | 6.2        | 4.9       | 5.1         | 5.2         | 5.7        | ****                  | **** |
| IMT (intimal medial thickness)        | mm                | 0.6 (0.1)     | 0.5       | 0.5         | 0.6         | 0.7        | 0.5       | 0.5         | 0.6         | 0.7        | ****                  | **** |
| PWV (pulse wave velocity)             | cm/s              | 671.0 (226.0) | 513.0     | 623.0       | 741.0       | 925.0      | 495.0     | 589.0       | 721.0       | 923.0      | ****                  | **** |
| <b><u>Derived variables</u></b>       |                   |               |           |             |             |            |           |             |             |            |                       |      |
| pulse pressure                        | mmHg              | 48.6 (13.0)   | 49.8      | 45.9        | 50.1        | 59.9       | 43.0      | 41.5        | 48.6        | 57.8       | ****                  | **** |
| mean BP                               | mmHg              | 93.2 (12.5)   | 87.6      | 94.5        | 102.0       | 104.0      | 82.7      | 86.7        | 96.2        | 101.0      | ****                  | **** |
| Wall/lumen                            | no units          | 0.2 (0.1)     | 0.2       | 0.2         | 0.2         | 0.2        | 0.2       | 0.2         | 0.2         | 0.2        | ****                  | **** |
| Vascular mass                         | mg/mm             | 11.0 (3.5)    | 9.2       | 10.5        | 12.8        | 16.4       | 8.4       | 9.3         | 10.8        | 14.1       | ****                  | **** |
| normalized PWV                        | cm/s/mmHg         | 7.2 (2.1)     | 5.9       | 6.6         | 7.3         | 8.9        | 6.0       | 6.8         | 7.5         | 9.2        | ****                  | ***  |
| <b><u>EKG variables</u></b>           |                   |               |           |             |             |            |           |             |             |            |                       |      |
| QTC (QT interval on EKG)              | msec              | 38.9 (2.8)    | 37.5      | 37.9        | 38.7        | 39.4       | 38.6      | 39.0        | 39.5        | 40.3       | ****                  | **** |
| PR (PR interval on EKG)               | msec              | 15.5 (2.9)    | 14.8      | 16.0        | 16.1        | 17.3       | 14.5      | 15.0        | 15.4        | 16.1       | ****                  | **** |
| <b><u>Sonographic variables</u></b>   |                   |               |           |             |             |            |           |             |             |            |                       |      |
| PSV (peak systolic velocity)          | cm/s              | 97.8 (27.9)   | 137.0     | 106.0       | 88.5        | 75.1       | 118.0     | 98.2        | 82.1        | 69.1       | ****                  | **** |
| EDV (end diastolic velocity)          | cm/s              | 24.6 (6.4)    | 28.5      | 25.6        | 23.4        | 18.3       | 27.8      | 26.7        | 24.5        | 18.7       | ****                  | **   |
| IP (pulsatility index)                | no units          | 1.9 (0.5)     | 2.5       | 2.2         | 1.9         | 2.0        | 2.1       | 1.8         | 1.6         | 1.7        | ****                  | **** |
| SD_ratio                              | no units          | 4.1 (1.1)     | 4.9       | 4.3         | 3.9         | 4.3        | 4.4       | 3.8         | 3.5         | 3.9        | ****                  | **** |
| AT (acceleration time)                | ms                | 73.7 (26.0)   | 73.6      | 70.7        | 70.2        | 79.4       | 68.6      | 67.0        | 74.4        | 91.6       | ****                  | **** |
| vti (integral time velocity)          | cm                | 35.7 (9.1)    | 43.6      | 37.6        | 34.1        | 29.3       | 38.9      | 36.6        | 34.3        | 28.4       | ****                  | **** |
| <b><u>Psychological Traits</u></b>    |                   |               |           |             |             |            |           |             |             |            |                       |      |
| NEO N NEUROTICISM                     |                   | 90.3 (19.2)   | 85.9      | 82.4        | 85.5        | 82.6       | 98.2      | 93.2        | 93.7        | 94.3       | ****                  | **** |
| NEO E EXTRAVERSION                    |                   | 107.0 (16.2)  | 114.0     | 111.0       | 106.0       | 103.0      | 113.0     | 107.0       | 102.0       | 99.1       | ****                  | **** |
| NEO O OPENNESS TO EXPERIENCE          |                   | 104.0 (17.4)  | 106.0     | 104.0       | 99.4        | 93.0       | 116.0     | 109.0       | 102.0       | 92.9       | ****                  | **** |
| NEO A AGREEABLENESS                   |                   | 119.0 (15.2)  | 108.0     | 114.0       | 117.0       | 124.0      | 115.0     | 122.0       | 124.0       | 129.0      | ****                  | **** |

| Age Band | # individual¶        | Overall |        | Males     |             |             |            | Females   |             |             |            | Significant Variation |      |
|----------|----------------------|---------|--------|-----------|-------------|-------------|------------|-----------|-------------|-------------|------------|-----------------------|------|
|          |                      | 6111    | (43.6) | 14-29 yrs | 30 - 44 yrs | 45 - 59 yrs | 60-102 yrs | 14-29 yrs | 30 - 44 yrs | 45 - 59 yrs | 60-102 yrs | Age                   | Sex  |
| NEO C    | CONSCIENTIOUSNESS    | 121.0   | (16.8) | 116.0     | 124.0       | 123.0       | 127.0      | 115.0     | 122.0       | 123.0       | 124.0      | ****                  | **** |
| NEO N1   | ANXIETY              | 18.0    | (4.9)  | 16.0      | 15.9        | 16.5        | 15.4       | 19.6      | 19.2        | 19.4        | 20.1       | ****                  | **** |
| NEO N2   | ANGRY HOSTILITY      | 14.2    | (4.3)  | 13.7      | 13.3        | 14.4        | 14.1       | 14.5      | 14.0        | 14.5        | 15.0       | ****                  | **** |
| NEO N3   | DEPRESSION           | 14.9    | (5.2)  | 13.3      | 12.9        | 13.9        | 14.6       | 16.0      | 15.1        | 16.2        | 16.8       | ****                  | **** |
| NEO N4   | SELF-CONSCIOUSNESS   | 15.4    | (4.4)  | 14.5      | 14.4        | 14.8        | 14.5       | 16.2      | 16.0        | 16.1        | 15.9       | ****                  | **** |
| NEO N5   | IMPULSIVENESS        | 14.9    | (4.1)  | 16.2      | 14.9        | 14.7        | 12.9       | 17.2      | 15.3        | 14.0        | 12.7       | ****                  | *    |
| NEO N6   | VULNERABILITY        | 12.8    | (4.2)  | 12.2      | 10.9        | 11.4        | 11.1       | 14.5      | 13.7        | 13.4        | 13.8       | ****                  | **** |
| NEO E1   | WARMTH               | 22.1    | (3.7)  | 21.5      | 22.1        | 21.8        | 22.5       | 22.2      | 22.5        | 22.3        | 22.2       | **                    | **** |
| NEO E2   | GREGARIOUSNESS       | 18.7    | (4.6)  | 19.3      | 18.7        | 17.7        | 17.7       | 20.6      | 18.9        | 17.8        | 17.6       | ****                  | ***  |
| NEO E3   | ASSERTIVENESS        | 14.6    | (3.9)  | 15.7      | 15.9        | 15.2        | 14.4       | 14.9      | 14.0        | 13.8        | 13.5       | ****                  | **** |
| NEO E4   | ACTIVITY             | 18.6    | (3.7)  | 18.4      | 19.3        | 18.4        | 17.9       | 18.0      | 18.9        | 18.7        | 18.6       | ****                  | **** |
| NEO E5   | EXCITEMENT-SEEKING   | 15.2    | (4.9)  | 19.4      | 17.2        | 15.6        | 13.9       | 17.4      | 13.6        | 12.6        | 11.5       | ****                  | **** |
| NEO E6   | POSITIVE EMOTIONS    | 18.2    | (4.7)  | 19.7      | 18.4        | 17.0        | 17.0       | 20.2      | 18.9        | 17.0        | 15.8       | ****                  | **** |
| NEO O1   | FANTASY              | 17.2    | (4.9)  | 18.2      | 17.2        | 15.9        | 14.3       | 20.3      | 18.3        | 16.1        | 14.2       | ****                  | **** |
| NEO O2   | AESTHETICS           | 18.7    | (4.6)  | 17.0      | 18.0        | 18.1        | 17.8       | 20.4      | 19.6        | 19.0        | 17.8       | ****                  | **** |
| NEO O3   | FEELINGS             | 18.8    | (3.8)  | 18.7      | 18.5        | 17.7        | 17.0       | 20.9      | 19.4        | 18.3        | 18.1       | ****                  | **** |
| NEO O4   | ACTIONS              | 16.3    | (3.7)  | 17.1      | 16.0        | 15.0        | 14.6       | 17.8      | 17.0        | 15.9        | 15.2       | ****                  | **** |
| NEO O5   | IDEAS                | 16.3    | (5.0)  | 17.0      | 17.2        | 16.3        | 14.1       | 17.9      | 16.9        | 16.0        | 13.2       | ****                  | **** |
| NEO O6   | VALUES               | 17.2    | (3.8)  | 18.2      | 17.6        | 16.3        | 15.3       | 18.9      | 18.1        | 16.4        | 14.5       | ****                  | *    |
| NEO A1   | TRUST                | 18.3    | (4.3)  | 17.0      | 18.2        | 18.8        | 19.2       | 17.0      | 18.6        | 19.1        | 18.9       | ****                  | **** |
| NEO A2   | STRAIGHTFORWARDNESS  | 20.2    | (4.5)  | 17.1      | 18.5        | 19.6        | 21.2       | 19.7      | 21.3        | 21.5        | 22.4       | ****                  | **** |
| NEO A3   | ALTRUISM             | 22.6    | (3.5)  | 21.4      | 21.7        | 21.8        | 22.6       | 22.9      | 23.3        | 23.3        | 23.5       | ****                  | **** |
| NEO A4   | COMPLIANCE           | 16.3    | (4.5)  | 14.1      | 15.6        | 16.3        | 17.8       | 14.2      | 16.5        | 17.7        | 19.0       | ****                  | **** |
| NEO A5   | MODESTY              | 19.8    | (3.9)  | 17.9      | 18.9        | 19.2        | 20.5       | 19.3      | 20.2        | 20.4        | 22.0       | ****                  | **** |
| NEO A6   | TENDER-MINDEDNESS    | 21.7    | (3.6)  | 20.1      | 20.8        | 21.0        | 22.3       | 21.9      | 22.0        | 22.0        | 23.4       | ****                  | **** |
| NEO C1   | COMPETENCE           | 19.5    | (3.4)  | 18.9      | 20.3        | 20.0        | 20.9       | 18.6      | 19.3        | 19.3        | 19.8       | ****                  | **** |
| NEO C2   | ORDER                | 18.3    | (4.1)  | 17.6      | 18.3        | 18.2        | 18.3       | 17.9      | 18.7        | 18.5        | 18.7       | ****                  | **   |
| NEO C3   | DUTIFULNESS          | 23.4    | (3.8)  | 21.6      | 23.6        | 23.8        | 24.2       | 22.0      | 23.8        | 24.2        | 24.3       | ****                  | **   |
| NEO C4   | ACHIEVEMENT STRIVING | 19.5    | (3.8)  | 19.4      | 20.2        | 19.5        | 20.4       | 19.2      | 18.9        | 19.2        | 19.7       | ****                  | **** |
| NEO C5   | SELF-DISCIPLINE      | 21.0    | (4.0)  | 20.2      | 21.8        | 21.2        | 21.7       | 19.8      | 21.3        | 21.1        | 20.9       | ****                  | **** |
| NEO C6   | DELIBERATION         | 19.6    | (4.5)  | 18.3      | 20.1        | 20.3        | 21.5       | 17.7      | 19.4        | 20.1        | 21.1       | ****                  | **** |

¶: Mean and SD of sample size are calculated based on 60 traits, excluding PSA (2604), TSH (3461), HbA1C (3495), 35 psychological traits (5657)

\*: p-value < 0.05

\*\*: p-value < 0.01

\*\*\*: p-value < 0.001

\*\*\*\*: p-value < 0.0005
